# Supplementary material for: Product Validation and Stability Testing of Pharmacy Compounded Cholic Acid Capsules for Dutch Patients with Rare Bile Acid Synthesis Defects
Source: MDPI journal article supplement (doi:10.3390/pharmaceutics15030773), 2023-02-26
Supplement: s1 [file s1]

## Supplementary Material

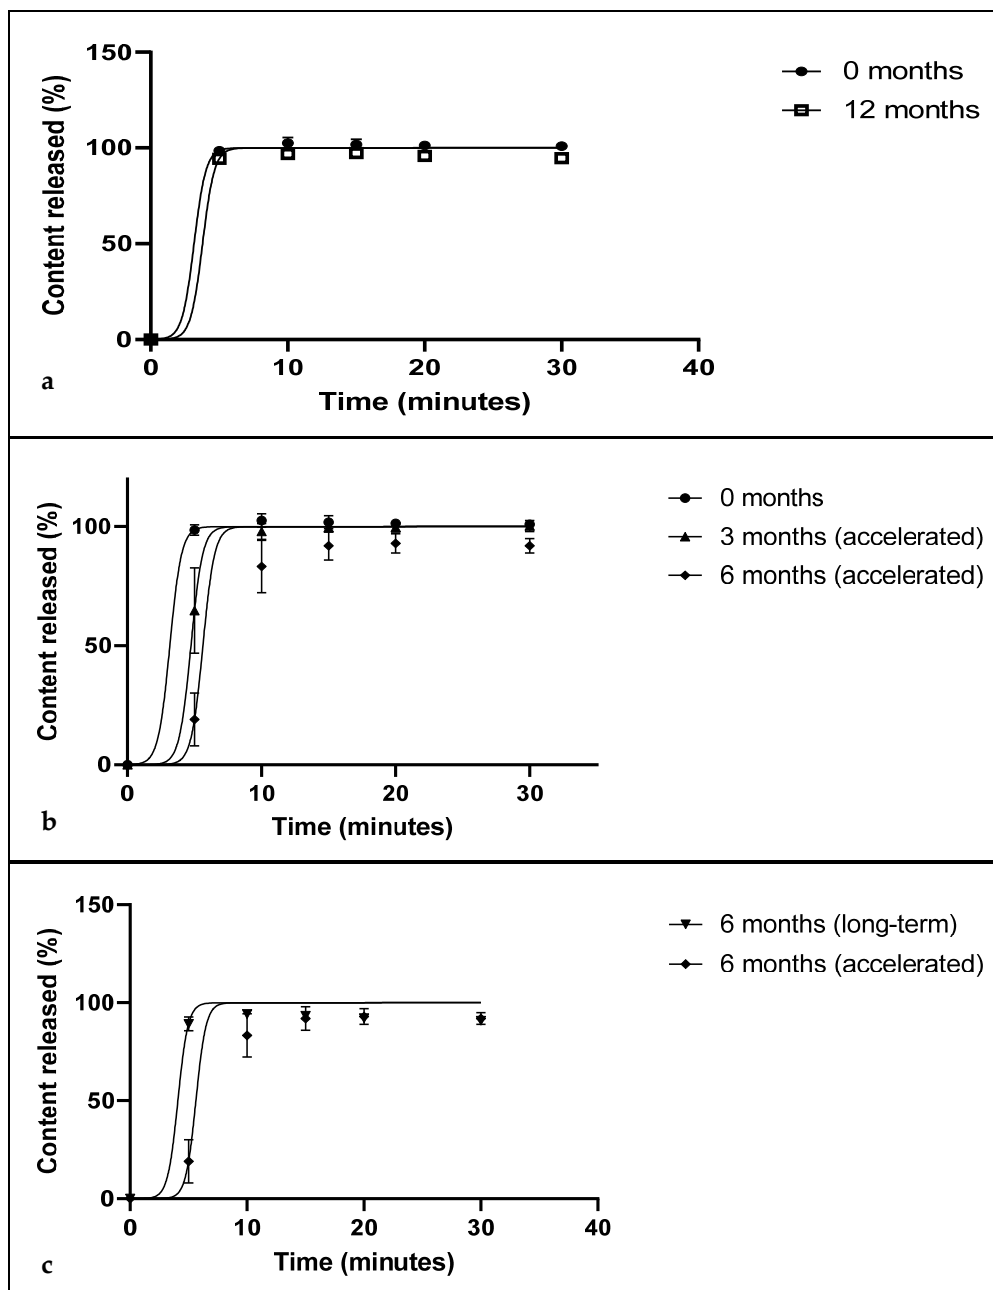

**Figure S1.** Dissolution profiles of 25 mg CA capsules: (a) Dissolution profile of 25 mg CA capsule at T0 vs. T12, stored under long-term storage conditions (25°C ± 2°C / 60% ± 5% RH); (b) Dissolution profile of 25 mg CA capsule at T0 vs. T3 and T6, stored under accelerated storage conditions (40°C ± 2°C / 75% ± 5% RH) ; (c) Dissolution profile of 25 mg CA capsule at T6 stored under long-term (25°C ± 2°C / 60% ± 5% RH) vs. accelerated storage conditions (40°C ± 2°C / 75% ± 5% RH).

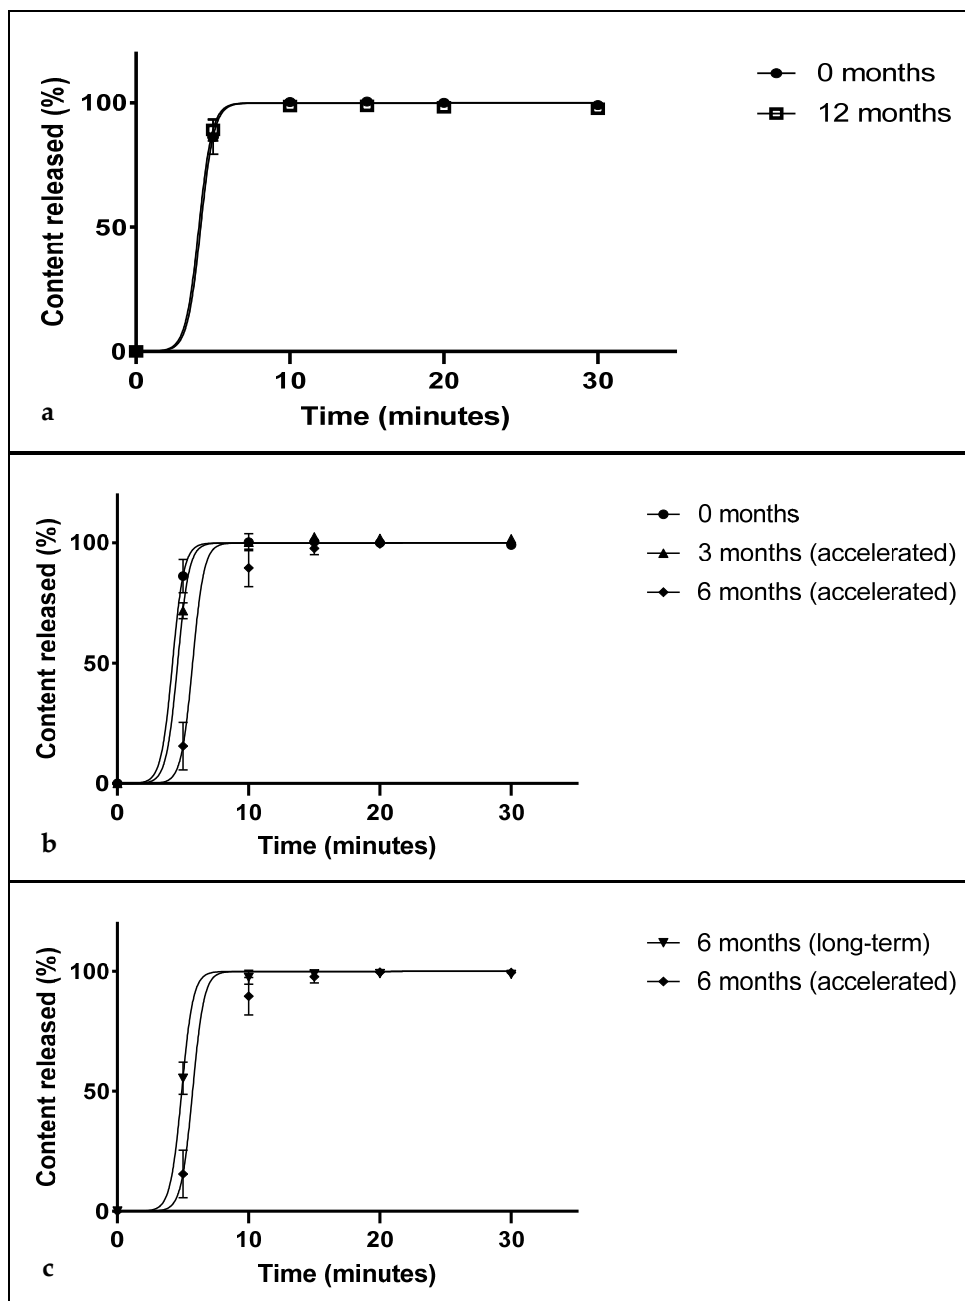

**Figure S2.** Dissolution profiles of 250 mg CA capsules: (a) Dissolution profile of 250 mg CA capsule at T0 vs. T12, stored under long-term storage conditions (25°C ± 2°C / 60% ± 5% RH) ; (b) Dissolution profile of 250 mg CA capsule at T0 vs. T3 and T6, stored under accelerated storage conditions (40°C ± 2°C / 75% ± 5% RH) ; (c) Dissolution profile of 250 mg CA capsule at T6 stored under long-term (25°C ± 2°C / 60% ± 5% RH) vs. accelerated storage conditions (40°C ± 2°C / 75% ± 5% RH).

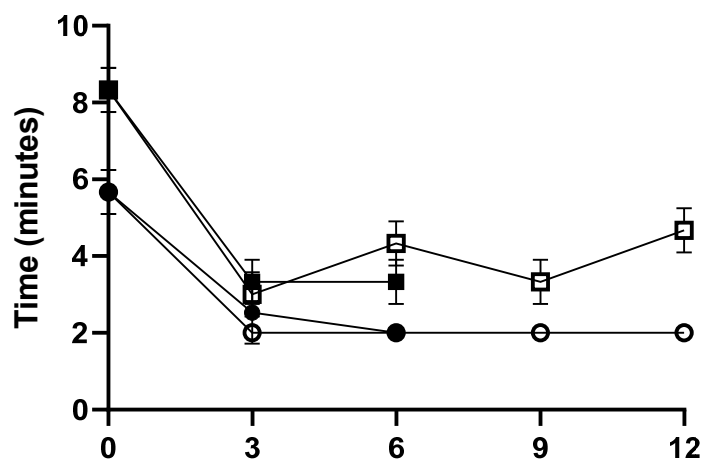

**Figure S3.** Disintegration times of 25 and 250 mg CA capsules stored over time under long-term conditions ( $25^{\circ}\text{C} \pm 2^{\circ}\text{C} / 60\% \pm 5\% \text{ RH}$ ) and accelerated (stressed) storage conditions ( $40^{\circ}\text{C} \pm 2^{\circ}\text{C} / 75\% \pm 5\% \text{ RH}$ ) (mean  $\pm$  SD,  $n=3$ ). o 25 mg CA capsule under long-term storage condition; • 25 mg CA capsule under accelerated storage condition; □ 250 mg CA capsule under long-term storage condition; ■ 250 mg CA capsule under accelerated storage condition.

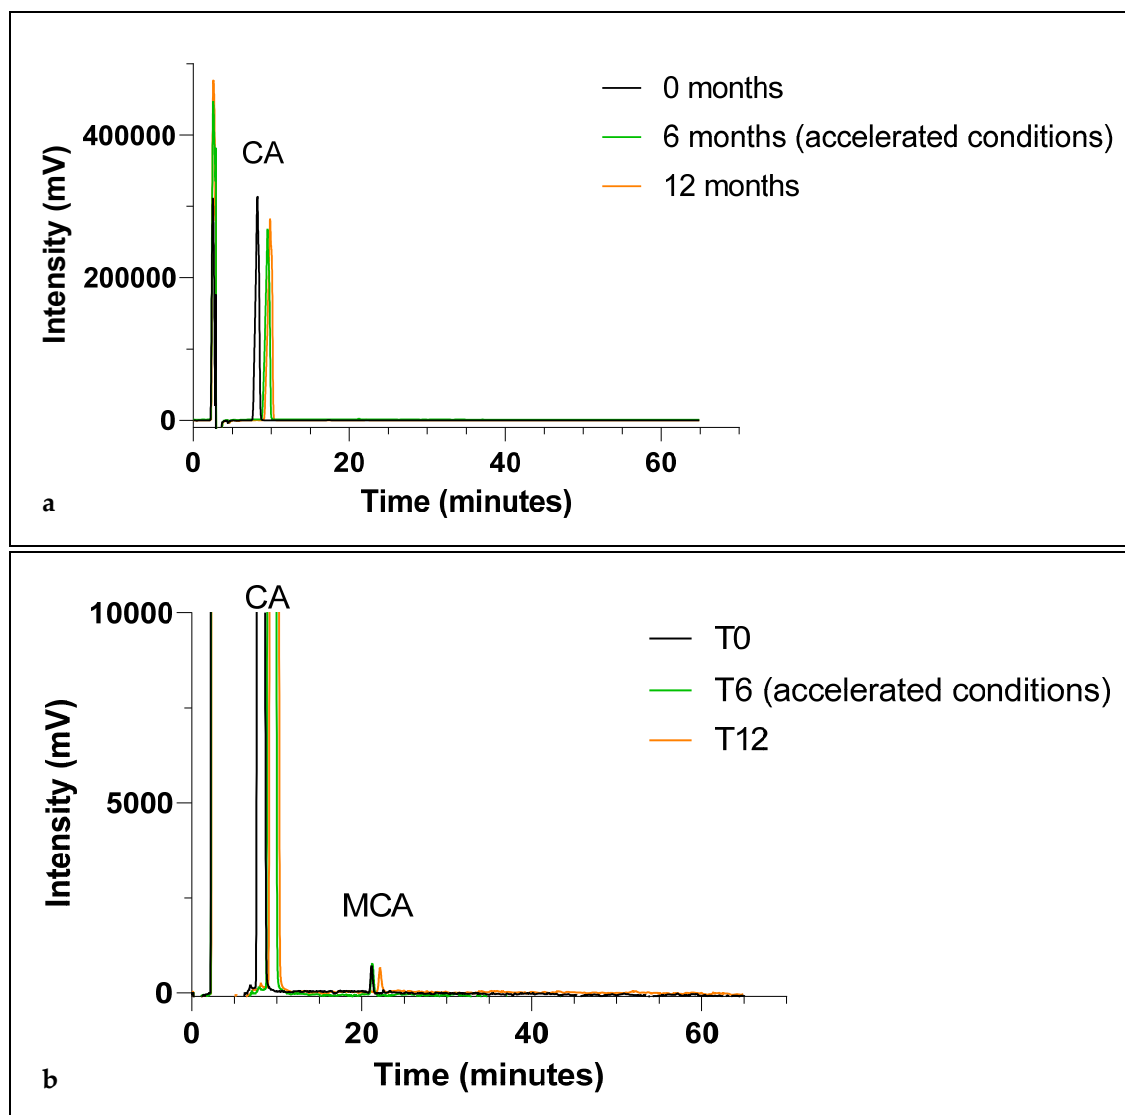

**Figure S4.** Representative chromatograms of related substance HPLC-RI analysis of 25 mg CA capsules at T0 and T12, stored under long-term storage conditions ( $25^{\circ}\text{C} \pm 2^{\circ}\text{C}$  /  $60\% \pm 5\%$  RH), and T6, stored under accelerated (stressed) storage conditions ( $40^{\circ}\text{C} \pm 2^{\circ}\text{C}$  /  $75\% \pm 5\%$  RH). HPLC-RI analysis using RID-10A detector and a reversed phase X-bridge BEH phenyl column  $250 \times 4.6 \times 3.5 \mu\text{m}$  ( $30^{\circ}\text{C} \pm 2^{\circ}\text{C}$ ), injection volume:  $30 \mu\text{L}$ , flow rate:  $1.0 \text{ mL/min}$ , mobile phase:  $30 \text{ mmol/L}$  potassium dihydrogen phosphate ( $\text{KH}_2\text{PO}_4$ ) and  $600 \mu\text{L}$  phosphoric acid in a 1 liter mixture of water/acetonitril (ACN)(60:40); (a) CA peaks at  $\pm 8,3$  minutes; (b) MCA peaks at  $\pm 22$  minutes (chromatogram enlarged).

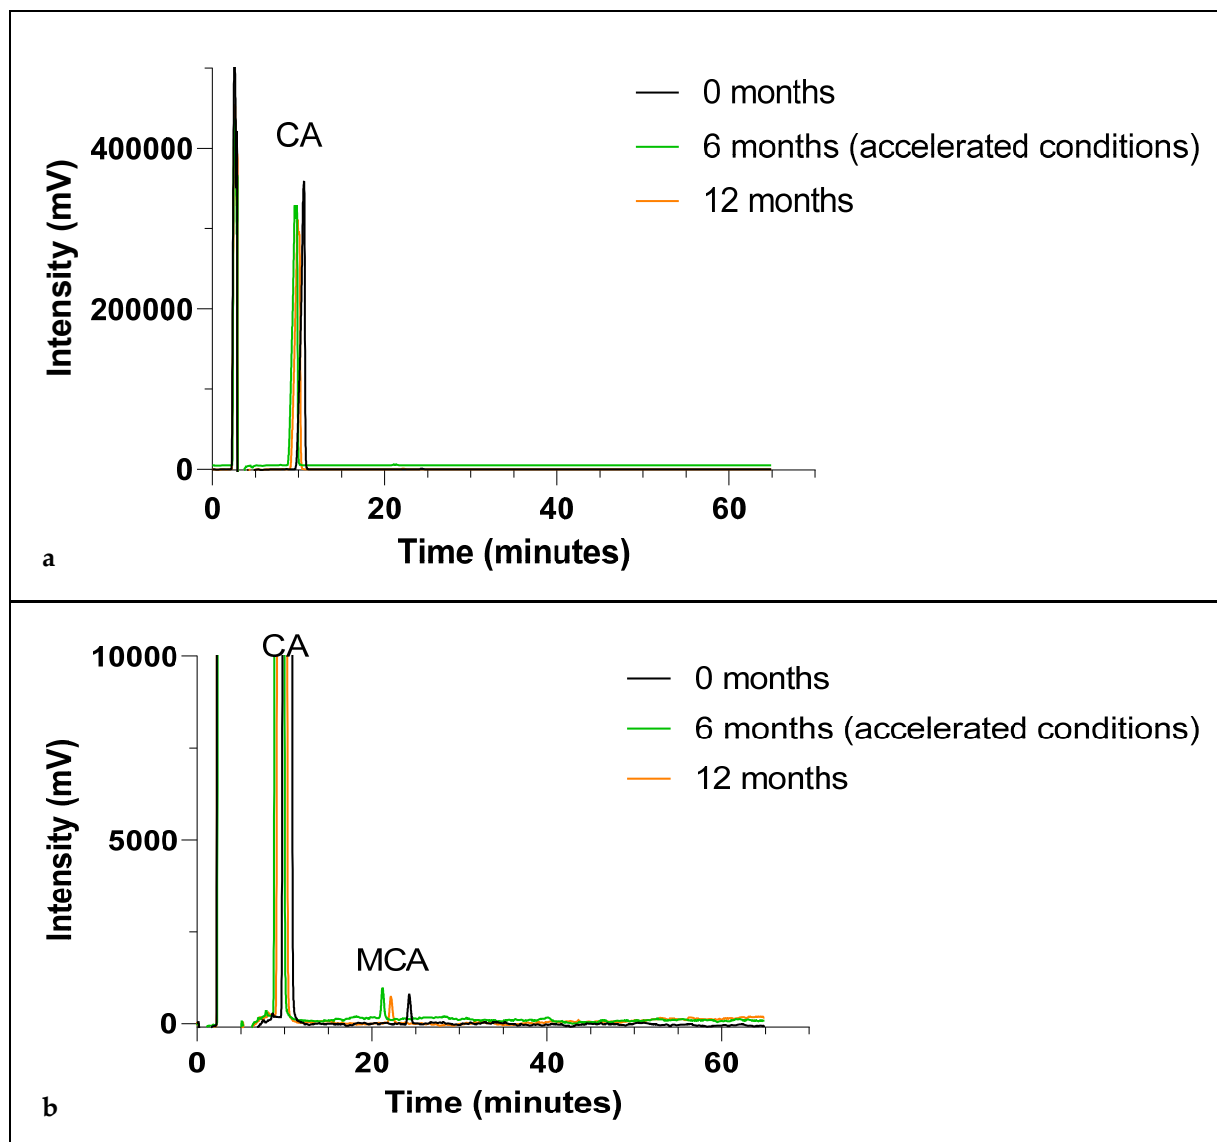

**Figure S5.** Representative chromatograms of related substance HPLC-RI analysis of 250 mg CA capsules at T0 and T12, stored under long-term storage conditions ( $25^{\circ}\text{C} \pm 2^{\circ}\text{C}$  /  $60\% \pm 5\%$  RH), and T6, stored under accelerated (stressed) storage conditions ( $40^{\circ}\text{C} \pm 2^{\circ}\text{C}$  /  $75\% \pm 5\%$  RH). HPLC-RI analysis using RID-10A detector and a reversed phase X-bridge BEH phenyl column  $250 \times 4.6 \times 3.5 \mu\text{m}$  ( $30^{\circ}\text{C} \pm 2^{\circ}\text{C}$ ), injection volume:  $30 \mu\text{L}$ , flow rate:  $1.0 \text{ mL/min}$ , mobile phase:  $30 \text{ mmol/L}$  potassium dihydrogen phosphate ( $\text{KH}_2\text{PO}_4$ ) and  $600 \mu\text{L}$  phosphoric acid in a 1 liter mixture of water/acetonitril (ACN)(60:40); (a) CA peaks at  $\pm 8,3$  minutes; (b) MCA peaks at  $\pm 22$  minutes (chromatogram enlarged).
